# Supplementary material
Source: PubMed Central journal article supplement (PMC8772146)
Supplement: 12874_2021_1501_MOESM3_ESM.pdf [file 12874_2021_1501_MOESM3_ESM.pdf]

Additional file 3 – Overview of publications

| PMID     | Author                    | Journal                     | DOI                               | Country of origin | Number of participants | Topic                          | Percentage adherence |
|----------|---------------------------|-----------------------------|-----------------------------------|-------------------|------------------------|--------------------------------|----------------------|
| 32220112 | N. Tang, et al.           | J Thromb Haemost            | 10.1111/jth.14817                 | China             | 449                    | Anticoagulation                | 35.71%               |
| 32297985 | X. Shi, et al.            | J Med Virol                 | 10.1002/jmv.25893                 | China             | 184                    | Antivirals                     | 30.77%               |
| 32379955 | J. Geleris, et al.        | N Engl J Med                | 10.1056/NEJMoa2012410             | USA               | 1446                   | Antimalarials                  | 51.61%               |
| 32392282 | E. S. Rosenberg, et al.   | Jama                        | 10.1001/jama.2020.8630            | USA               | 1438                   | Combination of pharmaceuticals | 75.86%               |
| 32409486 | M. Mahévas, et al.        | Bmj                         | 10.1136/bmj.m1844                 | France            | 181                    | Antimalarials                  | 63.33%               |
| 32418114 | B. Yu, et al.             | Sci China Life Sci          | 10.1007/s11427-020-1732-2         | China             | 550                    | Antimalarials                  | 23.08%               |
| 32427279 | R. Fadel, et al.          | Clin Infect Dis             | 10.1093/cid/ciaa601               | USA               | 213                    | Glucocorticoids                | 53.33%               |
| 32430428 | D. Yan, et al.            | Eur Respir J                | 10.1183/13993003.00799-2020       | China             | 120                    | Antivirals                     | 42.31%               |
| 32445881 | P. Xu, et al.             | Microbes Infect             | 10.1016/j.micinf.2020.05.012      | China             | 141                    | Combination of pharmaceuticals | 50.00%               |
| 32476080 | L. Ayerbe, et al.         | J Thromb Thrombolysis       | 10.1007/s11239-020-02162-z        | UK                | 2075                   | Anticoagulation                | 34.48%               |
| 32492205 | T. Yu, et al.             | J Med Virol                 | 10.1002/jmv.26129                 | China             | 129                    | Antivirals                     | 34.62%               |
| 32496422 | M. Yuan, et al.           | Shock                       | 10.1097/shk.0000000000001574      | China             | 132                    | Glucocorticoids                | 33.33%               |
| 32553536 | C. C. Price, et al.       | Chest                       | 10.1016/j.chest.2020.06.006       | USA               | 239                    | Monoclonal antibodies          | 62.07%               |
| 32554861 | Y. Huang, et al.          | Aging (Albany NY)           | 10.18632/aging.103370             | China             | 238                    | Combination of pharmaceuticals | 21.43%               |
| 32565309 | X. Li, et al.             | Pharmacol Res               | 10.1016/j.phrs.2020.105036        | China             | 151                    | Antivirals                     | 38.46%               |
| 32569363 | G. Rojas-Marte, et al.    | Qjm                         | 10.1093/qjmed/hcaa206             | USA               | 193                    | Monoclonal antibodies          | 30.77%               |
| 32570043 | L. Quartuccio, et al.     | J Clin Virol                | 10.1016/j.jcv.2020.104444         | Italy             | 111                    | Monoclonal antibodies          | 39.29%               |
| 32571831 | A. Fernández-Cruz, et al. | Antimicrob Agents Chemother | 10.1128/aac.01168-20              | Spain             | 462                    | Glucocorticoids                | 62.07%               |
| 32593867 | J. C. Lagier, et al.      | Travel Med Infect Dis       | 10.1016/j.tmaid.2020.101791       | France            | 3737                   | Combination of pharmaceuticals | 33.33%               |
| 32621621 | C. Yu, et al.             | J Med Virol                 | 10.1002/jmv.26260                 | China             | 128                    | Antivirals                     | 41.38%               |
| 32623082 | S. Arshad, et al.         | Int J Infect Dis            | 10.1016/j.ijid.2020.06.099        | USA               | 2541                   | Combination of pharmaceuticals | 51.85%               |
| 32634602 | F. Bani-Sadr, et al.      | Int J Antimicrob Agents     | 10.1016/j.ijantimicag.2020.106077 | France            | 257                    | Glucocorticoids                | 32.14%               |
| 32652164 | R. Rossotti, et al.       | J Infect                    | 10.1016/j.jinf.2020.07.008        | Italy             | 222                    | Monoclonal antibodies          | 14.29%               |
| 32687645 | M. Kelly, et al.          | Br J Clin Pharmacol         | 10.1111/bcp.14482                 | Ireland           | 134                    | Combination of pharmaceuticals | 15.38%               |
| 32699031 | D. R. Rivera, et al.      | Cancer Discov               | 10.1158/2159-8290.Cd-20-0941      | USA               | 2186                   | Combination of pharmaceuticals | 50.00%               |
| 32706859 | S. A. Olender, et al.     | Clin Infect Dis             | 10.1093/cid/ciaa1041              | USA               | 1130                   | Antivirals                     | 53.57%               |
| 32707096 | N. Wang, et al.           | Cell Host Microbe           | 10.1016/j.chom.2020.07.005        | China             | 446                    | Immunomodulators               | 57.69%               |
| 32712334 | S. Tong, et al.           | Int J Antimicrob Agents     | 10.1016/j.ijantimicag.2020.106114 | China             | 115                    | Antivirals                     | 53.85%               |
| 32713677 | L. M. Canziani, et al.    | J Autoimmun                 | 10.1016/j.jaut.2020.102511        | Italy             | 128                    | Monoclonal antibodies          | 35.71%               |
| 32720702 | T. Maeda, et al.          | J Med Virol                 | 10.1002/jmv.26365                 | USA               | 224                    | Monoclonal antibodies          | 46.15%               |
| 32721528 | P. Sinha, et al.          | Int J Infect Dis            | 10.1016/j.ijid.2020.07.023        | USA               | 255                    | Monoclonal antibodies          | 42.86%               |
| 32728438 | S. W. X. Ong, et al.      | Clin Transl Immunology      | 10.1002/cti2.1159                 | Singapore         | 168                    | Immunomodulators               | 50.00%               |
| 32732245 | M. Scarsi, et al.         | Ann Rheum Dis               | 10.1136/annrheumdis-2020-217712   | Italy             | 262                    | Other pharmaceuticals          | 39.29%               |
| 32736237 | Y. Hu, et al.             | Biomed Pharmacother         | 10.1016/j.biopha.2020.110529      | China             | 308                    | Glucocorticoids                | 34.62%               |
| 32740371 | G. Gao, et al.            | J Acquir Immune Defic Syndr | 10.1097/qai.0000000000002452      | China             | 129                    | Combination of pharmaceuticals | 23.08%               |
| 32748578 | S. R. Hao, et al.         | J Zhejiang Univ Sci B       | 10.1631/jzus.B2000211             | China             | 104                    | Combination of pharmaceuticals | 42.86%               |
| 32755653 | B. Davido, et al.         | Int J Antimicrob Agents     | 10.1016/j.ijantimicag.2020.106129 | France            | 132                    | Combination of pharmaceuticals | 44.44%               |
| 32763357 | M. Kalligeros, et al.     | J Glob Antimicrob Resist    | 10.1016/j.jgar.2020.07.018        | USA               | 108                    | Antimalarials                  | 21.43%               |
| 32767353 | A. De Giorgi, et al.      | Eur Rev Med Pharmacol Sci   | 10.26355/eurrev_202008_22511      | Italy             | 151                    | Antivirals                     | 34.62%               |

|          |                                |                           |                                   |             |      |                                |        |
|----------|--------------------------------|---------------------------|-----------------------------------|-------------|------|--------------------------------|--------|
| 32772069 | B. C. Nelson, et al.           | Clin Infect Dis           | 10.1093/cid/ciaa1163              | USA         | 117  | Glucocorticoids                | 53.57% |
| 32776534 | A. Giacomelli, et al.          | J Med Virol               | 10.1002/jmv.26407                 | Italy       | 172  | Combination of pharmaceuticals | 46.15% |
| 32784192 | S. Roomi, et al.               | J Med Internet Res        | 10.2196/21758                     | USA         | 176  | Combination of pharmaceuticals | 42.31% |
| 32790733 | A. Ip, et al.                  | PLoS One                  | 10.1371/journal.pone.0237693      | USA         | 547  | Combination of pharmaceuticals | 57.69% |
| 32791263 | J. Tian, et al.                | Pharmacol Res             | 10.1016/j.phrs.2020.105127        | China       | 721  | Traditional Chinese medicine   | 51.85% |
| 32795143 | Y. Li, et al.                  | Emerg Microbes Infect     | 10.1080/22221751.2020.1807885     | China       | 119  | Glucocorticoids                | 42.31% |
| 32795897 | M. Wu, et al.                  | Int Immunopharmacol       | 10.1016/j.intimp.2020.106873      | China       | 334  | Immunomodulators               | 39.29% |
| 32798660 | T. Klopfenstein, et al.        | Int J Infect Dis          | 10.1016/j.ijid.2020.08.024        | France      | 206  | Monoclonal antibodies          | 57.69% |
| 32804611 | M. J. Keller, et al.           | J Hosp Med                | 10.12788/jhm.3497                 | USA         | 1806 | Glucocorticoids                | 58.62% |
| 32804790 | A. C. Hernandez-Romieu, et al. | Crit Care Med             | 10.1097/ccm.0000000000004600      | USA         | 231  | Ventilation                    | 60.71% |
| 32817707 | M. Mikulska, et al.            | PLoS One                  | 10.1371/journal.pone.0237831      | Italy       | 196  | Combination of pharmaceuticals | 44.83% |
| 32835257 | G. Guaraldi, et al.            | Lancet Rheumatol          | 10.1016/s2665-9913(20)30173-9     | Italy       | 544  | Monoclonal antibodies          | 64.29% |
| 32838323 | N. Biran, et al.               | Lancet Rheumatol          | 10.1016/s2665-9913(20)30277-0     | USA         | 764  | Monoclonal antibodies          | 63.33% |
| 32847947 | M. Patel, et al.               | BMJ Open Respir Res       | 10.1136/bmjresp-2020-000650       | USA         | 104  | Ventilation                    | 40.74% |
| 32852338 | J. F. Mather, et al.           | Am J Gastroenterol        | 10.14309/ajg.0000000000000832     | USA         | 878  | Other pharmaceuticals          | 37.93% |
| 32853673 | L. Catteau, et al.             | Int J Antimicrob Agents   | 10.1016/j.ijantimicag.2020.106144 | Belgium     | 8075 | Antimalarials                  | 41.38% |
| 32857301 | H. Rahmani, et al.             | Daru                      | 10.1007/s40199-020-00369-2        | Iran        | 213  | Combination of pharmaceuticals | 28.57% |
| 32859477 | A. D. Castelnovo, et al.       | Eur J Intern Med          | 10.1016/j.ejim.2020.08.019        | Italy       | 3451 | Antimalarials                  | 62.07% |
| 32860964 | J. Rodríguez-Baño, et al.      | Clin Microbiol Infect     | 10.1016/j.cmi.2020.08.010         | Spain       | 778  | Combination of pharmaceuticals | 51.72% |
| 32872629 | F. Albani, et al.              | J Clin Med                | 10.3390/jcm9092800                | Italy       | 1376 | Combination of pharmaceuticals | 53.57% |
| 32880390 | J. Wu, et al.                  | J Clin Endocrinol Metab   | 10.1210/clinem/dgaa627            | China       | 1763 | Glucocorticoids                | 48.15% |
| 32881982 | A. Rodríguez-Molinero, et al.  | PLoS One                  | 10.1371/journal.pone.0238681      | Spain       | 418  | Other pharmaceuticals          | 51.72% |
| 32882767 | E. J. Kim, et al.              | Yonsei Med J              | 10.3349/ymj.2020.61.9.826         | South Korea | 110  | Antivirals                     | 25.00% |
| 32885463 | J. Ferguson, et al.            | J Clin Pharmacol          | 10.1002/jcph.1749                 | USA         | 141  | Anticoagulation                | 27.59% |
| 32903258 | M. Majmundar, et al.           | PLoS One                  | 10.1371/journal.pone.0238827      | USA         | 205  | Glucocorticoids                | 57.69% |
| 32911000 | M. Schiavone, et al.           | Int J Cardiol             | 10.1016/j.ijcard.2020.09.001      | Italy       | 844  | Anticoagulation                | 42.86% |
| 32926319 | Z. Shu, et al.                 | Front Med                 | 10.1007/s11684-020-0803-8         | China       | 293  | Traditional Chinese medicine   | 34.62% |
| 32926320 | G. Chen, et al.                | Front Med                 | 10.1007/s11684-020-0813-6         | China       | 312  | Traditional Chinese medicine   | 59.26% |
| 32926573 | M. Lauriola, et al.            | Clin Transl Sci           | 10.1111/cts.12860                 | Italy       | 377  | Combination of pharmaceuticals | 50.00% |
| 32930657 | P. M. Carlucci, et al.         | J Med Microbiol           | 10.1099/jmm.0.001250              | USA         | 932  | Antivirals                     | 34.62% |
| 32941741 | J. Chen, et al.                | Expert Rev Respir Med     | 10.1080/17476348.2020.1822741     | China       | 200  | Combination of pharmaceuticals | 40.74% |
| 32941927 | R. Huang, et al.               | Eur J Pharmacol           | 10.1016/j.ejphar.2020.173556      | China       | 309  | Glucocorticoids                | 35.71% |
| 32946668 | M. R. Pereira, et al.          | Am J Transplant           | 10.1111/ajt.16314                 | USA         | 117  | Monoclonal antibodies          | 32.26% |
| 32954492 | R. Yang, et al.                | Eur J Clin Invest         | 10.1111/eci.13412                 | China       | 175  | Glucocorticoids                | 21.43% |
| 32960147 | R. Pereda, et al.              | J Interferon Cytokine Res | 10.1089/jir.2020.0124             | Cuba        | 761  | Immunomodulators               | 21.43% |
| 32960899 | G. Ruiz-Irastorza, et al.      | PLoS One                  | 10.1371/journal.pone.0239401      | Spain       | 242  | Glucocorticoids                | 43.33% |
| 32971254 | M. Bartoletti, et al.          | Clin Microbiol Infect     | 10.1016/j.cmi.2020.09.014         | Italy       | 513  | Glucocorticoids                | 65.52% |
| 32979572 | J. Martínez-Sanz, et al.       | Clin Microbiol Infect     | 10.1016/j.cmi.2020.09.021         | Spain       | 1229 | Monoclonal antibodies          | 56.67% |
| 32988602 | O. Breik, et al.               | Br J Anaesth              | 10.1016/j.bja.2020.08.023         | UK          | 164  | Ventilation                    | 41.38% |
| 32995704 | F. Ionescu, et al.             | TH Open                   | 10.1055/s-0040-1716721            | USA         | 127  | Anticoagulation                | 53.57% |
| 32997237 | L. Ayerbe, et al.              | Intern Emerg Med          | 10.1007/s11739-020-02505-x        | UK          | 2075 | Antimalarials                  | 33.33% |
| 33002613 | M. A. Kaminski, et al.         | Int J Infect Dis          | 10.1016/j.ijid.2020.09.1447       | USA         | 125  | Monoclonal antibodies          | 34.62% |
| 33007454 | A. J. J. Lammers, et al.       | Int J Infect Dis          | 10.1016/j.ijid.2020.09.1460       | Netherlands | 1064 | Antimalarials                  | 61.54% |
| 33007478 | Z. Liu, et al.                 | Clin Microbiol Infect     | 10.1016/j.cmi.2020.09.045         | China       | 646  | Glucocorticoids                | 51.72% |

|          |                                    |                                |                                   |             |      |                                |        |
|----------|------------------------------------|--------------------------------|-----------------------------------|-------------|------|--------------------------------|--------|
| 33023669 | C. Ferrando, et al.                | Crit Care                      | 10.1186/s13054-020-03314-6        | Spain       | 199  | Ventilation                    | 57.14% |
| 33027192 | V. Russo, et al.                   | J Cardiovasc Pharmacol         | 10.1097/fjc.0000000000000893      | Italy       | 100  | Anticoagulation                | 26.92% |
| 33035673 | M. Rubio-Rivas, et al.             | Int J Infect Dis               | 10.1016/j.ijid.2020.09.1486       | Spain       | 189  | Glucocorticoids                | 57.69% |
| 33038227 | R. Rogers, et al.                  | Clin Infect Dis                | 10.1093/cid/ciaa1548              | USA         | 241  | Other pharmaceuticals          | 58.62% |
| 33043287 | F. Albani, et al.                  | EClinicalMedicine              | 10.1016/j.eclinm.2020.100562      | Italy       | 1403 | Anticoagulation                | 68.97% |
| 33043484 | F. Ionescu, et al.                 | Eur J Haematol                 | 10.1111/ejh.13533                 | USA         | 3480 | Anticoagulation                | 61.54% |
| 33044019 | F. H. Annie, et al.                | Pharmacotherapy                | 10.1002/phar.2467                 | USA         | 734  | Antimalarials                  | 48.28% |
| 33047335 | B. Atallah, et al.                 | Anaesthesia                    | 10.1111/anae.15300                | UAE         | 188  | Anticoagulation                | 42.31% |
| 33058865 | S. Yeramaneni, et al.              | Gastroenterology               | 10.1053/j.gastro.2020.10.011      | USA         | 7000 | Other pharmaceuticals          | 37.04% |
| 33065103 | J. C. Rajter, et al.               | Chest                          | 10.1016/j.chest.2020.10.009       | USA         | 280  | Other pharmaceuticals          | 58.62% |
| 33068758 | E. J. Peters, et al.               | Clin Microbiol Infect          | 10.1016/j.cmi.2020.10.004         | Netherlands | 1949 | Antimalarials                  | 54.84% |
| 33072814 | F. Salton, et al.                  | Open Forum Infect Dis          | 10.1093/ofid/ofaa421              | Italy       | 173  | Glucocorticoids                | 67.86% |
| 33072869 | M. Rivera-Izquierdo, et al.        | Med Clin (Engl Ed)             | 10.1016/j.medcle.2020.06.024      | Spain       | 238  | Combination of pharmaceuticals | 38.46% |
| 33075378 | S. Narain, et al.                  | Chest                          | 10.1016/j.chest.2020.09.275       | USA         | 5776 | Combination of pharmaceuticals | 53.57% |
| 33080002 | S. Gupta, et al.                   | JAMA Intern Med                | 10.1001/jamainternmed.2020.6252   | USA         | 3924 | Monoclonal antibodies          | 64.52% |
| 33090501 | J. Qu, et al.                      | Clin Exp Pharmacol Physiol     | 10.1111/1440-1681.13425           | China       | 170  | Antivirals                     | 38.46% |
| 33093359 | J. H. Chow, et al.                 | Anesth Analg                   | 10.1213/ane.0000000000005292      | USA         | 412  | Anticoagulation                | 58.62% |
| 33097047 | W. Gao, et al.                     | Virology                       | 10.1186/s12985-020-01428-5        | China       | 220  | Antivirals                     | 21.43% |
| 33107607 | C. Tortajada, et al.               | J Med Virol                    | 10.1002/jmv.26635                 | Spain       | 115  | Glucocorticoids                | 57.69% |
| 33107664 | E. M. H. Padrão, et al.            | Acad Emerg Med                 | 10.1111/acem.14160                | USA         | 166  | Ventilation                    | 82.14% |
| 33115682 | M. Górgolas Hernández-Mora, et al. | Int J Infect Dis               | 10.1016/j.ijid.2020.10.045        | Spain       | 186  | Monoclonal antibodies          | 42.31% |
| 33117850 | M. Kalligeros, et al.              | Open Forum Infect Dis          | 10.1093/ofid/ofaa319              | USA         | 224  | Antivirals                     | 50.00% |
| 33122096 | R. Derwand, et al.                 | Int J Antimicrob Agents        | 10.1016/j.ijantimicag.2020.106214 | Germany     | 141  | Combination of pharmaceuticals | 46.15% |
| 33127507 | M. J. Choi, et al.                 | Int J Infect Dis               | 10.1016/j.ijid.2020.10.062        | South Korea | 4197 | Combination of pharmaceuticals | 58.62% |
| 33129511 | A. Rodríguez-Molinero, et al.      | Med Clin (Barc)                | 10.1016/j.medcli.2020.08.003      | Spain       | 187  | Glucocorticoids                | 48.28% |
| 33133323 | T. Sandhu, et al.                  | Can J Infect Dis Med Microbiol | 10.1155/2020/8865954              | USA         | 112  | Other pharmaceuticals          | 50.00% |
| 33137493 | S. N. Szenté Fonseca, et al.       | Travel Med Infect Dis          | 10.1016/j.tmaid.2020.101906       | Brazil      | 717  | Combination of pharmaceuticals | 46.15% |
| 33138975 | R. Nadeem, et al.                  | Heart Lung                     | 10.1016/j.hrtlng.2020.10.009      | UAE         | 149  | Anticoagulation                | 19.23% |
| 33141117 | J. Liu, et al.                     | J Clin Invest                  | 10.1172/jci140617                 | China       | 774  | Glucocorticoids                | 48.28% |
| 33148005 | J. Shi, et al.                     | Am J Chin Med                  | 10.1142/s0192415x20500755         | China       | 234  | Traditional Chinese medicine   | 40.74% |
| 33154452 | A. Tsai, et al.                    | Sci Rep                        | 10.1038/s41598-020-76187-y        | USA         | 274  | Monoclonal antibodies          | 44.44% |
| 33165755 | I. J. Núñez-Gil, et al.            | Intern Emerg Med               | 10.1007/s11739-020-02543-5        | Spain       | 1021 | Combination of pharmaceuticals | 50.00% |
| 33172477 | C. Wu, et al.                      | Crit Care                      | 10.1186/s13054-020-03340-4        | China       | 382  | Glucocorticoids                | 72.41% |
| 33181320 | N. Shi, et al.                     | Pharmacol Res                  | 10.1016/j.phrs.2020.105290        | China       | 782  | Traditional Chinese medicine   | 42.86% |
| 33186991 | H. H. Billett, et al.              | Thromb Haemost                 | 10.1055/s-0040-1720978            | USA         | 3625 | Anticoagulation                | 42.86% |
| 33187911 | C. Liu, et al.                     | Int Immunopharmacol            | 10.1016/j.intimp.2020.107157      | China       | 473  | Other pharmaceuticals          | 35.71% |
| 33208294 | Q. Sun, et al.                     | Int Immunopharmacol            | 10.1016/j.intimp.2020.107143      | China       | 771  | Immunomodulators               | 48.28% |
| 33219551 | A. Papamanoli, et al.              | Eur J Clin Invest              | 10.1111/eci.13458                 | USA         | 447  | Glucocorticoids                | 67.86% |
| 33220354 | G. Bozzi, et al.                   | J Allergy Clin Immunol         | 10.1016/j.jaci.2020.11.006        | Italy       | 120  | Combination of pharmaceuticals | 36.67% |
| 33225307 | T. C. Lewis, et al.                | Crit Care Explor               | 10.1097/cce.0000000000000283      | USA         | 1000 | Monoclonal antibodies          | 57.14% |
| 33225952 | S. Jonmarker, et al.               | Crit Care                      | 10.1186/s13054-020-03375-7        | Sweden      | 152  | Anticoagulation                | 57.14% |
| 33275267 | J. Y. Liu, et al.                  | Eur Rev Med Pharmacol Sci      | 10.26355/eurrev_202011_23854      | China       | 148  | Antivirals                     | 26.92% |
| 33277573 | V. Spagnuolo, et al.               | Sci Rep                        | 10.1038/s41598-020-78039-1        | Italy       | 280  | Glucocorticoids                | 33.33% |
| 33280066 | B. Ruiz-Antorán, et al.            | Infect Dis Ther                | 10.1007/s40121-020-00373-8        | Spain       | 506  | Monoclonal antibodies          | 61.54% |

|          |                            |                           |                                    |             |      |                                |        |
|----------|----------------------------|---------------------------|------------------------------------|-------------|------|--------------------------------|--------|
| 33288411 | E. Cereda, et al.          | Nutrition                 | 10.1016/j.nut.2020.111055          | Italy       | 324  | Other pharmaceuticals          | 17.86% |
| 33298617 | J. Tian, et al.            | J Immunol                 | 10.4049/jimmunol.2000981           | China       | 195  | Monoclonal antibodies          | 55.56% |
| 33307378 | J. Echarte-Morales, et al. | J Electrocardiol          | 10.1016/j.jelectrocard.2020.11.012 | Spain       | 168  | Combination of pharmaceuticals | 42.86% |
| 33307734 | K. Canoglu, et al.         | Ann Saudi Med             | 10.5144/0256-4947.2020.462         | Turkey      | 154  | Anticoagulation                | 34.62% |
| 33315350 | A. Demir, et al.           | Turk J Med Sci            | 10.3906/sag-2009-140               | Turkey      | 109  | Other pharmaceuticals          | 34.62% |
| 33322317 | S. F. Ling, et al.         | Nutrients                 | 10.3390/nu12123799                 | UK          | 444  | Other pharmaceuticals          | 69.23% |
| 33326457 | R. Borie, et al.           | PLoS One                  | 10.1371/journal.pone.0243961       | France      | 171  | Combination of pharmaceuticals | 50.00% |
| 33333102 | J. Tan, et al.             | Virus Res                 | 10.1016/j.virusres.2020.198262     | China       | 333  | Combination of pharmaceuticals | 34.62% |
| 33333252 | M. J. Fisher, et al.       | Int J Infect Dis          | 10.1016/j.ijid.2020.12.021         | USA         | 115  | Monoclonal antibodies          | 46.15% |
| 33337933 | R. Pereda, et al.          | J Interferon Cytokine Res | 10.1089/jir.2020.0188              | Cuba        | 2000 | Immunomodulators               | 23.08% |
| 33339536 | Y. Li, et al.              | Crit Care                 | 10.1186/s13054-020-03429-w         | China       | 294  | Glucocorticoids                | 50.00% |
| 33342929 | Y. Su, et al.              | Biosci Trends             | 10.5582/bst.2020.03340             | China       | 600  | Antimalarials                  | 26.92% |
| 33357219 | M. Hu, et al.              | BMC Pulm Med              | 10.1186/s12890-020-01354-w         | China       | 105  | Ventilation                    | 57.69% |
| 33358502 | M. Li, et al.              | Am J Med Sci              | 10.1016/j.amjms.2020.11.005        | USA         | 1938 | Monoclonal antibodies          | 30.77% |
| 33365358 | M. Falcone, et al.         | Open Forum Infect Dis     | 10.1093/ofid/ofaa563               | Italy       | 315  | Anticoagulation                | 48.28% |
| 33382449 | N. Vernaz, et al.          | Swiss Med Wkly            | 10.4414/smw.2020.20446             | Switzerland | 840  | Combination of pharmaceuticals | 53.33% |
| 33382734 | X. You, et al.             | PLoS One                  | 10.1371/journal.pone.0244128       | China       | 367  | Glucocorticoids                | 55.56% |
| 33382796 | J. Walker, et al.          | PLoS One                  | 10.1371/journal.pone.0244857       | UK          | 347  | Ventilation                    | 69.23% |
| 33408529 | A. Potalivo, et al.        | Clin Epidemiol            | 10.2147/cep.S278709                | Italy       | 1424 | Ventilation                    | 60.71% |
| 33412395 | P. Baghaei, et al.         | Int Immunopharmacol       | 10.1016/j.intimp.2020.107329       | Iran        | 456  | Combination of pharmaceuticals | 32.14% |
