# Supplementary material
Source: PubMed Central journal article supplement (PMC8772146)
Supplement: 12874_2021_1501_MOESM5_ESM.pdf [file 12874_2021_1501_MOESM5_ESM.pdf]

## Additional file 5 – Summary of excluded publications of observational studies on the treatment of COVID-19

| PDMI     | Author                           | Journal                        | DOI                           | Reason for exclusion   |
|----------|----------------------------------|--------------------------------|-------------------------------|------------------------|
| 32171872 | Deng L et al.                    | J Infect                       | 10.1016/j.jinf.2020.03.002    | Number of participants |
| 32173576 | Liu F et al.                     | Int J Infect Dis               | 10.1016/j.ijid.2020.03.013    | No clinical outcomes   |
| 32198776 | Wan S et al.                     | J Med Virol                    | 10.1002/jmv.25783             | No analytical data     |
| 32220033 | Wu J et al.                      | J Intern Med                   | 10.1111/joim.13063            | No clinical outcomes   |
| 32223012 | Easom N et al.                   | Influenza Other Respir Viruses | 10.1111/irv.12739             | No clinical outcomes   |
| 32227274 | Yuan J et al.                    | Inflamm Res                    | 10.1007/s00011-020-01342-0    | Number of participants |
| 32236562 | Huang M et al.                   | J Mol Cell Biol                | 10.1093/jmcb/mjaa014          | Number of participants |
| 32253318 | Duan K et al.                    | Proc Natl Acad Sci U S A       | 10.1073/pnas.2004168117       | No clinical outcomes   |
| 32253759 | Luo P et al.                     | J Med Virol                    | 10.1002/jmv.25801             | Number of participants |
| 32255489 | Perinel S et al.                 | Clin Infect Dis                | 10.1093/cid/ciaa394           | Number of participants |
| 32266987 | Zha L et al.                     | Med J Aust                     | 10.5694/mja2.50577            | Number of participants |
| 32271456 | Ye XT et al.                     | Eur Rev Med Pharmacol Sci      | 10.26355/eurrev_202003_20706  | Number of participants |
| 32275753 | Wu Y et al.                      | QJM                            | 10.1093/qjmed/hcaa121         | Number of participants |
| 32275812 | Grein J et al.                   | N Engl J Med                   | 10.1056/NEJMoa2007016         | Number of participants |
| 32278670 | Barrasa H et al.                 | Anaesth Crit Care Pain Med     | 10.1016/j.accpm.2020.04.001   | Number of participants |
| 32283143 | Zhu Z et al.                     | J Infect                       | 10.1016/j.jinf.2020.03.060    | Number of participants |
| 32283325 | Fan Z et al.                     | Clin Gastroenterol Hepatol     | 10.1016/j.cgh.2020.04.002     | No clinical outcomes   |
| 32289548 | Gautret P et al.                 | Travel Med Infect Dis          | 10.1016/j.tmaid.2020.101663   | Number of participants |
| 32320677 | Giamarellos-Bourboulis EJ et al. | Cell Host Microbe              | 10.1016/j.chom.2020.04.009    | No clinical outcomes   |
| 32321905 | Sato K et al.                    | Biosci Trends                  | 10.5582/bst.2020.03082        | No clinical outcomes   |
| 32324898 | Sun J et al.                     | Clin Pharmacol Ther            | 10.1002/cpt.1866              | No clinical outcomes   |
| 32329231 | Testa S et al.                   | J Thromb Haemost               | 10.1111/jth.14871             | No clinical outcomes   |
| 32330343 | Pereira MR et al.                | Am J Transplant                | 10.1111/ajt.15941             | No clinical outcomes   |
| 32344167 | Lian N et al.                    | Clin Microbiol Infect          | 10.1016/j.cmi.2020.04.026     | Number of participants |
| 32347743 | Saleh M et al.                   | Circ Arrhythm Electrophysiol   | 10.1161/CIRCEP.120.008662     | No clinical outcomes   |
| 32348485 | Zeng QL et al.                   | J Infect Dis                   | 10.1093/infdis/jiaa228        | Number of participants |
| 32350134 | Xu X et al.                      | Proc Natl Acad Sci U S A       | 10.1073/pnas.2005615117       | Number of participants |
| 32353223 | Zangrillo A et al.               | Crit Care Resusc               | missing                       | No clinical outcomes   |
| 32369191 | Alattar R et al.                 | J Med Virol                    | 10.1002/jmv.25964             | Number of participants |
| 32387320 | Klopfenstein T et al.            | Med Mal Infect                 | 10.1016/j.medmal.2020.05.001  | Number of participants |
| 32387409 | Million M et al.                 | Travel Med Infect Dis          | 10.1016/j.tmaid.2020.101738   | No analytical data     |
| 32403946 | Stroppa EM et al.                | Future Oncol                   | 10.2217/fon-2020-0369         | No clinical outcomes   |
| 32404630 | Prabhakaran K et al.             | J Trauma Acute Care Surg       | 10.1097/TA.0000000000002780   | No clinical outcomes   |
| 32405160 | Capra R et al.                   | Eur J Intern Med               | 10.1016/j.ejim.2020.05.009    | Number of participants |
| 32407884 | Chorin E et al.                  | Heart Rhythm                   | 10.1016/j.hrthm.2020.05.014   | No clinical outcomes   |
| 32409150 | Vouri SM et al.                  | Res Social Adm Pharm           | 10.1016/j.sapharm.2020.04.031 | No clinical outcomes   |
| 32410206 | Huang Q et al.                   | Int J Clin Pharm               | 10.1007/s11096-020-01031-2    | Number of participants |
| 32410714 | Yu Y et al.                      | Crit Care                      | 10.1186/s13054-020-02939-x    | No analytical data     |
| 32411770 | Jiang Y et al.                   | Ann Transl Med                 | 10.21037/atm.2020.04.20       | No clinical outcomes   |
| 32418730 | Gérard A et al.                  | Thérapie                       | 10.1016/j.therap.2020.05.002  | No clinical outcomes   |
| 32420751 | Zhang HT et al.                  | Am J Chin Med                  | 10.1142/S0192415X20500391     | Number of participants |
| 32423903 | Stoneham SM et al.               | Clin Med (Lond)                | 10.7861/clinmed.2020-0228     | No analytical data     |
| 32427613 | Yang X et al.                    | Crit Care Med                  | 10.1097/CCM.0000000000004447  | Number of participants |
| 32437770 | Goicoechea M et al.              | Kidney Int                     | 10.1016/j.kint.2020.04.031    | No clinical outcomes   |

|          |                          |                               |                                  |                        |
|----------|--------------------------|-------------------------------|----------------------------------|------------------------|
| 32439366 | Cipriani A et al.        | Int J Cardiol                 | 10.1016/j.ijcard.2020.05.036     | No clinical outcomes   |
| 32441771 | Ross SB et al.           | J Am Geriatr Soc              | 10.1111/jgs.16623                | No analytical data     |
| 32441786 | Gong Y et al.            | J Med Virol                   | 10.1002/jmv.26052                | Number of participants |
| 32446167 | Peng H et al.            | J Clin Virol                  | 10.1016/j.jcv.2020.104425        | No clinical outcomes   |
| 32446698 | Freedberg DE et al.      | Gastroenterology              | 10.1053/j.gastro.2020.05.053     | Number of participants |
| 32447102 | Marfella R et al.        | Diabetes Metab                | 10.1016/j.diabet.2020.05.005     | No clinical outcomes   |
| 32449128 | Rogado J et al.          | Clin Transl Oncol             | 10.1007/s12094-020-02381-z       | No analytical data     |
| 32463348 | Ramireddy A et al.       | J Am Heart Assoc              | 10.1161/JAHA.120.017144          | No clinical outcomes   |
| 32473109 | Salazar E et al.         | Am J Pathol                   | 10.1016/j.ajpath.2020.05.014     | No analytical data     |
| 32473657 | Vizcarra P et al.        | Lancet HIV                    | 10.1016/S2352-3018(20)30164-8    | No clinical outcomes   |
| 32473681 | Kuderer NM et al.        | Lancet                        | 10.1016/S0140-6736(20)31187-9    | No clinical outcomes   |
| 32475019 | Irie K et al.            | Clin Transl Sci               | 10.1111/cts.12827                | No clinical outcomes   |
| 32482597 | Campochiaro C et al.     | Eur J Intern Med              | 10.1016/j.ejim.2020.05.021       | Number of participants |
| 32492211 | Zuo Y et al.             | J Med Virol                   | 10.1002/jmv.26127                | No clinical outcomes   |
| 32495917 | Ding JG et al.           | Eur Rev Med Pharmacol Sci     | 10.26355/eurrev_202005_21373     | No analytical data     |
| 32501538 | Zhang Z et al.           | J Med Virol                   | 10.1002/jmv.26141                | Number of participants |
| 32505076 | Rogado J et al.          | Lung Cancer                   | 10.1016/j.lungcan.2020.05.034    | No analytical data     |
| 32506862 | Liu Z et al.             | J Tradit Chin Med             | 10.19852/j.cnki.jtcm.2020.03.016 | Number of participants |
| 32510169 | Chen W et al.            | J Med Virol                   | 10.1002/jmv.26142                | Number of participants |
| 32515499 | Quartuccio L et al.      | J Med Virol                   | 10.1002/jmv.26149                | No clinical outcomes   |
| 32518419 | La Rosée F et al.        | Leukemia                      | 10.1038/s41375-020-0891-0        | No clinical outcomes   |
| 32525844 | Joyner MJ et al.         | J Clin Invest                 | 10.1172/JCI140200                | No clinical outcomes   |
| 32531138 | Zeng QL et al.           | Transbound Emerg Dis          | 10.1111/tbed.13674               | No clinical outcomes   |
| 32535147 | Rinott E et al.          | Clin Microbiol Infect         | 10.1016/j.cmi.2020.06.003        | No clinical outcomes   |
| 32536150 | Kim JW et al.            | Korean J Intern Med           | 10.3904/kjim.2020.224            | Number of participants |
| 32549293 | Singh AP et al.          | J Clin Med                    | 10.3390/jcm9061867               | No clinical outcomes   |
| 32556143 | Paccoud O et al.         | Clin Infect Dis               | 10.1093/cid/ciaa791              | Number of participants |
| 32562159 | Vahedi E et al.          | Daru                          | 10.1007/s40199-020-00353-w       | Number of participants |
| 32564984 | Callejas Rubio JL et al. | Rev Esp Geriatr Gerontol      | 10.1016/j.regg.2020.05.004       | No clinical outcomes   |
| 32569585 | Coppo A et al.           | Lancet Respir Med             | 10.1016/S2213-2600(20)30268-X    | Number of participants |
| 32570995 | Selvaraj V et al.        | R I Med J (2013)              | missing                          | Number of participants |
| 32573419 | Conrozier T et al.       | Clin Exp Rheumatol            | missing                          | No analytical data     |
| 32574262 | Zhou Q et al.            | Front Immunol                 | 10.3389/fimmu.2020.01061         | Number of participants |
| 32574789 | Lohse A et al.           | Microbes Infect               | 10.1016/j.micinf.2020.06.005     | Number of participants |
| 32575124 | Jordan SC et al.         | Clin Infect Dis               | 10.1093/cid/ciaa812              | No analytical data     |
| 32585284 | Khamis F et al.          | Int J Infect Dis              | 10.1016/j.ijid.2020.06.064       | Number of participants |
| 32588427 | Bun SS et al.            | Clin Pharmacol Ther           | 10.1002/cpt.1968                 | No clinical outcomes   |
| 32589775 | Humeniuk R et al.        | Clin Transl Sci               | 10.1111/cts.12840                | No clinical outcomes   |
| 32597466 | Titanji BK et al.        | Clin Infect Dis               | 10.1093/cid/ciaa879              | Number of participants |
| 32602262 | Navarro-Millán I et al.  | Arthritis Rheumatol           | 10.1002/art.41422                | No clinical outcomes   |
| 32610165 | Hooks M et al.           | Heart Rhythm                  | 10.1016/j.hrthm.2020.06.029      | No clinical outcomes   |
| 32614258 | McGuinness G et al.      | Radiology                     | 10.1148/radiol.2020202352        | No clinical outcomes   |
| 32617986 | Salacup G et al.         | J Med Virol                   | 10.1002/jmv.26252                | No analytical data     |
| 32618699 | Trigonis RA et al.       | Crit Care Med                 | 10.1097/CCM.0000000000004472     | No clinical outcomes   |
| 32618700 | Parzy G et al.           | Crit Care Med                 | 10.1097/CCM.0000000000004504     | No clinical outcomes   |
| 32619760 | Chen X et al.            | Int J Infect Dis              | 10.1016/j.ijid.2020.06.091       | No clinical outcomes   |
| 32620597 | Della-Torre E et al.     | Ann Rheum Dis                 | 10.1136/annrheumdis-2020-218122  | Number of participants |
| 32621881 | Samuel S et al.          | Heart Rhythm                  | 10.1016/j.hrthm.2020.06.033      | No clinical outcomes   |
| 32628003 | Knorr JP et al.          | J Med Virol                   | 10.1002/jmv.26191                | Number of participants |
| 32628040 | Mei F et al.             | Arterioscler Thromb Vasc Biol | 10.1161/ATVBAHA.120.314779       | No clinical outcomes   |

|          |                                |                              |                                            |                        |
|----------|--------------------------------|------------------------------|--------------------------------------------|------------------------|
| 32629085 | Yamasaki Y et al.              | Virus Res                    | 10.1016/j.virusres.2020.198089             | Number of participants |
| 32633860 | Parker JE et al.               | Mov Disord                   | 10.1002/mds.28198                          | No clinical outcomes   |
| 32639062 | Gatti M et al.                 | Br J Clin Pharmacol          | 10.1111/bcp.14459                          | No clinical outcomes   |
| 32639466 | Bhumbra S et al.               | Pediatr Crit Care Med        | 10.1097/PCC.0000000000002511               | No analytical data     |
| 32641296 | Marzolini C et al.             | Antimicrob Agents Chemother  | 10.1128/AAC.01177-20                       | No clinical outcomes   |
| 32644223 | Li TZ et al.                   | J Med Virol                  | 10.1002/jmv.26280                          | Number of participants |
| 32644254 | Antony SJ et al.               | J Med Virol                  | 10.1002/jmv.26288                          | Number of participants |
| 32646770 | Morrison AR et al.             | J Autoimmun                  | 10.1016/j.jaut.2020.102512                 | Number of participants |
| 32652521 | Bisogno G et al.               | J Pediatric Infect Dis Soc   | 10.1093/jpids/piaa088                      | No analytical data     |
| 32653015 | Lecronier M et al.             | Crit Care                    | 10.1186/s13054-020-03117-9                 | Number of participants |
| 32654098 | Hsia BC et al.                 | J Interv Card Electrophysiol | 10.1007/s10840-020-00822-x                 | No clinical outcomes   |
| 32654422 | Pérez-Sáez MJ et al.           | Am J Transplant              | 10.1111/ajt.16192                          | Number of participants |
| 32662690 | Hiedra R et al.                | Expert Rev Anti Infect Ther  | 10.1080/14787210.2020.1794819              | Number of participants |
| 32672860 | Fernández-Ruiz M et al.        | J Med Virol                  | 10.1002/jmv.26308                          | Number of participants |
| 32677113 | Simmering JE et al.            | Pharmacotherapy              | 10.1002/phar.2445                          | No clinical outcomes   |
| 32686633 | Tuncer T et al.                | Cardiol Young                | 10.1017/S1047951120002425                  | No clinical outcomes   |
| 32688374 | Lê MP et al.                   | J Antimicrob Chemother       | 10.1093/jac/dkaa261                        | No clinical outcomes   |
| 32689588 | Dogra S et al.                 | J Stroke Cerebrovasc Dis     | 10.1016/j.jstrokecerebrovasdis.2020.104984 | No analytical data     |
| 32690352 | Moreno-Pérez O et al.          | J Autoimmun                  | 10.1016/j.jaut.2020.102523                 | No clinical outcomes   |
| 32692462 | Batteux B et al.               | Br J Clin Pharmacol          | 10.1111/bcp.14489                          | Number of participants |
| 32692874 | Pesavento R et al.             | J Thromb Haemost             | 10.1111/jth.15022                          | No clinical outcomes   |
| 32693646 | Peng L et al.                  | Expert Opin Drug Saf         | 10.1080/14740338.2020.1799975              | No clinical outcomes   |
| 32693650 | Tomasiewicz K et al.           | Expert Rev Anti Infect Ther  | 10.1080/14787210.2020.1800453              | Number of participants |
| 32699149 | Cauchois R et al.              | Proc Natl Acad Sci U S A     | 10.1073/pnas.2009017117                    | Number of participants |
| 32701969 | Satlin MJ et al.               | PLoS One                     | 10.1371/journal.pone.0236778               | No clinical outcomes   |
| 32703883 | Vianello A et al.              | Thorax                       | 10.1136/thoraxjnl-2020-214993              | Number of participants |
| 32709280 | Huang M et al.                 | Am J Med Sci                 | 10.1016/j.amjms.2020.05.038                | No clinical outcomes   |
| 32718719 | Brandariz-Nuñez D et al.       | Med Clin (Barc)              | 10.1016/j.medcli.2020.06.026               | No clinical outcomes   |
| 32719218 | Patel A et al.                 | Indian J Med Microbiol       | 10.4103/ijmm.IJMM_20_298                   | Number of participants |
| 32719218 | Patel A et al.                 | Indian J Med Microbiol       | 10.4103/ijmm.IJMM_20_298                   | No analytical data     |
| 32720612 | Mareev VY et al.               | Kardiologija                 | 10.18087/cardio.2020.6.n1226               | No clinical outcomes   |
| 32721580 | Montastruc F et al.            | Clin Gastroenterol Hepatol   | 10.1016/j.cgh.2020.07.050                  | No clinical outcomes   |
| 32726724 | Keske Ş et al.                 | Int J Infect Dis             | 10.1016/j.ijid.2020.07.036                 | Number of participants |
| 32750201 | Hu F et al.                    | Clin Respir J                | 10.1111/crj.13243                          | No clinical outcomes   |
| 32753141 | Voisin O et al.                | Mayo Clin Proc               | 10.1016/j.mayocp.2020.05.005               | No clinical outcomes   |
| 32758308 | Glibbery N et al.              | J Laryngol Otol              | 10.1017/S0022215120001759                  | Number of participants |
| 32766535 | Mastroianni A et al.           | EclinicalMedicine            | 10.1016/j.eclinm.2020.100410               | Number of participants |
| 32767349 | Ma Q et al.                    | Eur Rev Med Pharmacol Sci    | 10.26355/eurrev_202008_22508               | Number of participants |
| 32768693 | Langer-Gould A et al.          | Int J Infect Dis             | 10.1016/j.ijid.2020.07.081                 | Number of participants |
| 32768701 | Potere N et al.                | Int J Infect Dis             | 10.1016/j.ijid.2020.07.078                 | Number of participants |
| 32768975 | Xin S et al.                   | Biomed Pharmacother          | 10.1016/j.biopha.2020.110500               | Number of participants |
| 32773165 | Rivera-Izquierdo M et al.      | Med Clin (Barc)              | 10.1016/j.medcli.2020.06.025               | No clinical outcomes   |
| 32777263 | Lopez A et al.                 | Int J Antimicrob Agents      | 10.1016/j.ijantimicag.2020.106136          | Number of participants |
| 32779755 | Xue H et al.                   | J Med Virol                  | 10.1002/jmv.26193                          | No analytical data     |
| 32784217 | Montesarchio V et al.          | J Immunother Cancer          | 10.1136/jitc-2020-001089                   | Number of participants |
| 32789513 | van de Veerdonk FL et al.      | JAMA Netw Open               | 10.1001/jamanetworkopen.2020.17708         | Number of participants |
| 32790075 | Pettit NN et al.               | J Med Virol                  | 10.1002/jmv.26429                          | No clinical outcomes   |
| 32792492 | Liu F et al.                   | Sci Rep                      | 10.1038/s41598-020-70387-2                 | No analytical data     |
| 32795898 | Franzini M et al.              | Int Immunopharmacol          | 10.1016/j.intimp.2020.106879               | No analytical data     |
| 32808695 | Goncalves Mendes Neto A et al. | J Med Virol                  | 10.1002/jmv.26441                          | No clinical outcomes   |

|          |                          |                                       |                                       |                        |
|----------|--------------------------|---------------------------------------|---------------------------------------|------------------------|
| 32809969 | Bronte V et al.          | J Clin Invest                         | 10.1172/JCI141772                     | No clinical outcomes   |
| 32815344 | Gundem T et al.          | Tidsskr Nor Laegeforen                | 10.4045/tidsskr.20.0445               | No clinical outcomes   |
| 32820807 | Vaughn VM et al.         | Clin Infect Dis                       | 10.1093/cid/ciaa1239                  | No clinical outcomes   |
| 32826818 | Zhou S et al.            | Shock                                 | 10.1097/SHK.0000000000001629          | No analytical data     |
| 32827987 | Bakhshaliyev N et al.    | J Electrocardiol                      | 10.1016/j.jelectrocard.2020.08.008    | No clinical outcomes   |
| 32828896 | Dubernet A et al.        | J Glob Antimicrob Resist              | 10.1016/j.jgar.2020.08.001            | Number of participants |
| 32829390 | Pasquini Z et al.        | J Antimicrob Chemother                | 10.1093/jac/dkaa321                   | Number of participants |
| 32843231 | Iglesias-Julián E et al. | J Autoimmun                           | 10.1016/j.jaut.2020.102537            | Number of participants |
| 32844224 | Giaime P et al.          | Nephrol Dial Transplant               | 10.1093/ndt/gfaa191                   | No clinical outcomes   |
| 32853675 | Padilla S et al.         | Int J Antimicrob Agents               | 10.1016/j.ijantimicag.2020.106142     | No clinical outcomes   |
| 32855187 | Masur J et al.           | AJNR Am J Neuroradiol                 | 10.3174/ajnr.A6728                    | Number of participants |
| 32856202 | Cag Y et al.             | Eur J Clin Microbiol Infect Dis       | 10.1007/s10096-020-04016-1            | No analytical data     |
| 32856282 | Cojutti PG et al.        | Clin Pharmacokinet                    | 10.1007/s40262-020-00933-8            | No clinical outcomes   |
| 32858566 | Levy C et al.            | Am J Gastroenterol                    | 10.14309/ajg.0000000000000828         | No clinical outcomes   |
| 32860432 | Okoh AK et al.           | J Med Virol                           | 10.1002/jmv.26471                     | Number of participants |
| 32861333 | Joyner MJ et al.         | Mayo Clin Proc                        | 10.1016/j.mayocp.2020.06.028          | No analytical data     |
| 32871242 | Hogan li RB et al.       | Pulm Pharmacol Ther                   | 10.1016/j.pupt.2020.101942            | No analytical data     |
| 32881340 | Shi C et al.             | Clin Transl Sci                       | 10.1111/cts.12880                     | Number of participants |
| 32889236 | Zain Mushthaq M et al.   | Int Immunopharmacol                   | 10.1016/j.intimp.2020.106926          | No analytical data     |
| 32890069 | Inama G et al.           | J Cardiovasc Med (Hagerstown)         | 10.2459/JCM.0000000000001066          | No analytical data     |
| 32898149 | Lund LC et al.           | PLoS Med                              | 10.1371/journal.pmed.1003308          | No clinical outcomes   |
| 32900781 | Kirenga B et al.         | BMJ Open Respir Res                   | 10.1136/bmjresp-2020-000646           | No clinical outcomes   |
| 32907357 | Friedman DM et al.       | Circ Arrhythm Electrophysiol          | 10.1161/CIRCEP.120.008686             | No clinical outcomes   |
| 32907890 | Mouhat B et al.          | Eur Respir J                          | 10.1183/13993003.01811-2020           | No clinical outcomes   |
| 32912404 | Li T et al.              | Zhonghua Wei Zhong Bing Ji Jiu Yi Xue | 10.3760/cma.j.cn121430-20200513-00656 | No clinical outcomes   |
| 32912961 | Albertini L et al.       | Eur J Hosp Pharm                      | 10.1136/ejhpharm-2020-002414          | Number of participants |
| 32916565 | Musoke N et al.          | Thromb Res                            | 10.1016/j.thromres.2020.08.035        | No clinical outcomes   |
| 32920503 | Stattin K et al.         | J Crit Care                           | 10.1016/j.jcrc.2020.08.026            | Number of participants |
| 32920570 | Ayaz CM et al.           | Infez Med                             | missing                               | No clinical outcomes   |
| 32920751 | Osawa I et al.           | J Thromb Thrombolysis                 | 10.1007/s11239-020-02275-5            | No analytical data     |
| 32925581 | Zhang Q et al.           | J Trauma Acute Care Surg              | 10.1097/TA.0000000000002939           | Number of participants |
| 32926977 | Yousaf A et al.          | J Am Acad Dermatol                    | 10.1016/j.jaad.2020.09.009            | No clinical outcomes   |
| 32927129 | Tan Q et al.             | Bioorg Chem                           | 10.1016/j.bioorg.2020.104257          | Number of participants |
| 32932329 | Kanburoglu MK et al.     | Pediatr Infect Dis J                  | 10.1097/INF.0000000000002862          | No clinical outcomes   |
| 32934372 | Liu STH et al.           | Nat Med                               | 10.1038/s41591-020-1088-9             | Number of participants |
| 32936252 | Mercuro NJ et al.        | JAMA Cardiol                          | 10.1001/jamacardio.2020.1834          | No clinical outcomes   |
| 32936266 | Bessière F et al.        | JAMA Cardiol                          | 10.1001/jamacardio.2020.1787          | No clinical outcomes   |
| 32938838 | Kishaba T et al.         | Tohoku J Exp Med                      | 10.1620/tjem.252.103                  | No clinical outcomes   |
| 32943233 | Rambaldi A et al.        | Immunobiology                         | 10.1016/j.imbio.2020.152001           | Number of participants |
| 32950003 | Masiá M et al.           | EBioMedicine                          | 10.1016/j.ebiom.2020.102999           | No clinical outcomes   |
| 32954754 | Guo H et al.             | Ann Palliat Med                       | 10.21037/apm-20-1478                  | Number of participants |
| 32959052 | Hueso T et al.           | Blood                                 | 10.1182/blood.2020008423              | Number of participants |
| 32959400 | Liu W et al.             | J Intern Med                          | 10.1111/joim.13160                    | No clinical outcomes   |
| 32959730 | Udi J et al.             | J Intensive Care Med                  | 10.1177/0885066620954364              | Number of participants |
| 32965359 | Yaylaci S et al.         | Rev Assoc Med Bras (1992)             | 10.1590/1806-9282.66.S2.65            | No clinical outcomes   |
| 32965715 | Omrani AS et al.         | J Med Virol                           | 10.1002/jmv.26537                     | Number of participants |
| 32977129 | Pavoni V et al.          | Thromb Res                            | 10.1016/j.thromres.2020.09.013        | Number of participants |
| 32984833 | Barkama R et al.         | Crit Care Explor                      | 10.1097/CCE.0000000000000207          | Number of participants |
| 32993751 | Menzella F et al.        | Crit Care                             | 10.1186/s13054-020-03306-6            | Number of participants |
| 33003194 | Jing Y et al.            | Brief Bioinform                       | 10.1093/bib/bbaa234                   | No clinical outcomes   |

|          |                           |                              |                                            |                        |
|----------|---------------------------|------------------------------|--------------------------------------------|------------------------|
| 33003964 | Saleh M et al.            | Circ Arrhythm Electrophysiol | 10.1161/CIRCEP.120.008937                  | No clinical outcomes   |
| 33008327 | Wang B et al.             | BMC Infect Dis               | 10.1186/s12879-020-05425-5                 | Number of participants |
| 33009770 | Nachega JB et al.         | Am J Trop Med Hyg            | 10.4269/ajtmh.20-1240                      | No clinical outcomes   |
| 33015160 | Fu HY et al.              | Biomed Res Int               | 10.1155/2020/2854186                       | No clinical outcomes   |
| 33029193 | Shan W et al.             | Comput Math Methods Med      | 10.1155/2020/1391583                       | No clinical outcomes   |
| 33031081 | Li M et al.               | J Infect Dev Ctries          | 10.3855/jidc.13491                         | Number of participants |
| 33031085 | Meneses Calderón J et al. | J Infect Dev Ctries          | 10.3855/jidc.13274                         | No analytical data     |
| 33031409 | Correale P et al.         | PLoS One                     | 10.1371/journal.pone.0239692               | Number of participants |
| 33033405 | Guillén L et al.          | Sci Rep                      | 10.1038/s41598-020-74001-3                 | Number of participants |
| 33039952 | Tan CW et al.             | Nutrition                    | 10.1016/j.nut.2020.111017                  | Number of participants |
| 33040252 | Aranda-Abreu GE et al.    | Pharmacol Rep                | 10.1007/s43440-020-00168-1                 | Number of participants |
| 33043651 | Omidi N et al.            | J Card Surg                  | 10.1111/jocs.14707                         | No analytical data     |
| 33048786 | Vecchio G et al.          | Medicina (B Aires)           | missing                                    | No clinical outcomes   |
| 33051534 | Holt GE et al.            | Sci Rep                      | 10.1038/s41598-020-74328-x                 | Number of participants |
| 33054630 | Li W et al.               | Ther Adv Respir Dis          | 10.1177/1753466620963017                   | No clinical outcomes   |
| 33055313 | Giampreti A et al.        | J Perinat Med                | 10.1515/jpm-2020-0339                      | No clinical outcomes   |
| 33063035 | Sirimaturos M et al.      | Crit Care Explor             | 10.1097/CCE.0000000000000232               | Number of participants |
| 33064694 | Sosa-García JO et al.     | Cir Cir                      | 10.24875/CIRU.20000675                     | No clinical outcomes   |
| 33065275 | Annweiler C et al.        | J Steroid Biochem Mol Biol   | 10.1016/j.jsbmb.2020.105771                | Number of participants |
| 33066885 | Carneiro T et al.         | J Stroke Cerebrovasc Dis     | 10.1016/j.jstrokecerebrovasdis.2020.105201 | No clinical outcomes   |
| 33069626 | Zhang X et al.            | J Integr Med                 | 10.1016/j.joim.2020.10.002                 | Number of participants |
| 33078076 | Gamberini L et al.        | J Intensive Care             | 10.1186/s40560-020-00499-4                 | No clinical outcomes   |
| 33078372 | Garcia P et al.           | Drug Saf                     | 10.1007/s40264-020-01013-3                 | No clinical outcomes   |
| 33093279 | Caplan M et al.           | Crit Care Med                | 10.1097/CCM.00000000000004711              | No clinical outcomes   |
| 33111169 | Faíco-Filho KS et al.     | Braz J Microbiol             | 10.1007/s42770-020-00395-x                 | Number of participants |
| 33128800 | Søvik S et al.            | Acta Anaesthesiol Scand      | 10.1111/aas.13726                          | Number of participants |
| 33129099 | Valizadeh H et al.        | Int Immunopharmacol          | 10.1016/j.intimp.2020.107088               | Number of participants |
| 33136164 | Lee S et al.              | J Am Osteopath Assoc         | 10.7556/jaoa.2020.156                      | Number of participants |
| 33136589 | Guihaire J et al.         | ASAIO J                      | 10.1097/MAT.00000000000001251              | No clinical outcomes   |
| 33138974 | Ñamendys-Silva SA et al.  | Heart Lung                   | 10.1016/j.hrtlng.2020.10.013               | No clinical outcomes   |
| 33150470 | Cattaneo D et al.         | Drugs Aging                  | 10.1007/s40266-020-00812-8                 | No clinical outcomes   |
| 33151482 | Lin KJ et al.             | Drugs                        | 10.1007/s40265-020-01424-7                 | No clinical outcomes   |
| 33153629 | Temesgen Z et al.         | Mayo Clin Proc               | 10.1016/j.mayocp.2020.08.038               | Number of participants |
| 33154498 | Cohen IV et al.           | Sci Rep                      | 10.1038/s41598-020-76258-0                 | No clinical outcomes   |
| 33160408 | Rizzi S et al.            | BMC Res Notes                | 10.1186/s13104-020-05358-x                 | No clinical outcomes   |
| 33160854 | Li X et al.               | Int Immunopharmacol          | 10.1016/j.intimp.2020.107022               | No clinical outcomes   |
| 33161002 | Salvati L et al.          | Immunol Lett                 | 10.1016/j.imlet.2020.10.009                | Number of participants |
| 33164544 | Gunay S et al.            | Bratisl Lek Listy            | 10.4149/BLL_2020_134                       | No clinical outcomes   |
| 33165762 | de Cáceres C et al.       | Pharmacol Rep                | 10.1007/s43440-020-00186-z                 | Number of participants |
| 33168413 | Liu C et al.              | Int Immunopharmacol          | 10.1016/j.intimp.2020.107121               | No clinical outcomes   |
| 33175880 | Camprubí D et al.         | PLoS One                     | 10.1371/journal.pone.0242184               | No analytical data     |
| 33180360 | Mo Y et al.               | J Clin Pharmacol             | 10.1002/jcph.1787                          | Number of participants |
| 33181454 | Çap M et al.              | J Electrocardiol             | 10.1016/j.jelectrocard.2020.10.015         | No clinical outcomes   |
| 33181718 | Wang Y et al.             | Medicine (Baltimore)         | 10.1097/MD.00000000000023257               | No clinical outcomes   |
| 33186704 | Patterson BK et al.       | Int J Infect Dis             | 10.1016/j.ijid.2020.10.101                 | No analytical data     |
| 33187475 | Hong L et al.             | BMC Infect Dis               | 10.1186/s12879-020-05528-z                 | No analytical data     |
| 33188624 | Roumier M et al.          | J Clin Immunol               | 10.1007/s10875-020-00911-6                 | Number of participants |
| 33189888 | Corominas H et al.        | Clin Immunol                 | 10.1016/j.clim.2020.108631                 | No analytical data     |
| 33196991 | Bolzetta F et al.         | Aging Clin Exp Res           | 10.1007/s40520-020-01750-6                 | Number of participants |
| 33198670 | Arnold F et al.           | BMC Nephrol                  | 10.1186/s12882-020-02150-8                 | Number of participants |

|          |                                 |                                        |                                       |                        |
|----------|---------------------------------|----------------------------------------|---------------------------------------|------------------------|
| 33200828 | Hill JA et al.                  | J Med Virol                            | 10.1002/jmv.26674                     | Number of participants |
| 33204428 | Ji F et al.                     | New Microbes New Infect                | 10.1016/j.nmni.2020.100814            | No analytical data     |
| 33219294 | Lim JH et al.                   | Sci Rep                                | 10.1038/s41598-020-76915-4            | No clinical outcomes   |
| 33231925 | Abbas HM et al.                 | Int J Clin Pract                       | 10.1111/ijcp.13856                    | No clinical outcomes   |
| 33232277 | Han D et al.                    | Aging (Albany NY)                      | 10.18632/aging.202172                 | No clinical outcomes   |
| 33234007 | Sonti R et al.                  | J Intensive Care Med                   | 10.1177/0885066620976525              | Number of participants |
| 33234138 | Seeland U et al.                | BMC Med                                | 10.1186/s12916-020-01851-z            | No clinical outcomes   |
| 33236646 | Esen F et al.                   | Curr Med Res Opin                      | 10.1080/03007995.2020.1856058         | Number of participants |
| 33237291 | Hubiche T et al.                | JAMA Dermatol                          | 10.1001/jamadermatol.2020.4324        | No clinical outcomes   |
| 33249281 | Tsai KC et al.                  | Biomed Pharmacother                    | 10.1016/j.biopha.2020.111037          | Number of participants |
| 33256382 | Cesare Perotti et al.           | Haematologica                          | 10.3324/haematol.2020.261784          | No analytical data     |
| 33262433 | Macías J et al.                 | Sci Rep                                | 10.1038/s41598-020-78029-3            | No clinical outcomes   |
| 33264556 | WHO Solidarity Trial Consortium | N Engl J Med                           | 10.1056/NEJMoa2023184                 | No clinical outcomes   |
| 33287864 | Perier F et al.                 | Crit Care                              | 10.1186/s13054-020-03414-3            | Number of participants |
| 33290446 | Vaira LA et al.                 | Rhinology                              | 10.4193/Rhin20.515                    | Number of participants |
| 33291194 | Seyhan AU et al.                | J Coll Physicians Surg Pak             | 10.29271/jcpsp.2020.suppl2.S153       | No clinical outcomes   |
| 33292350 | Saavedra D et al.               | Immun Ageing                           | 10.1186/s12979-020-00207-8            | Number of participants |
| 33302991 | Kooistra EJ et al.              | Crit Care                              | 10.1186/s13054-020-03364-w            | Number of participants |
| 33305475 | Del Borrello G et al.           | J Thromb Haemost                       | 10.1111/jth.15216                     | Number of participants |
| 33307658 | Bodrova RA et al.               | Vopr Kurortol Fizioter Lech Fiz Kult   | 10.17116/kurort20209706111            | Number of participants |
| 33309764 | Denas G et al.                  | Int J Cardiol                          | 10.1016/j.ijcard.2020.12.024          | No clinical outcomes   |
| 33310665 | Hernández A et al.              | Int Immunopharmacol                    | 10.1016/j.intimp.2020.107261          | Number of participants |
| 33311551 | Landi L et al.                  | Sci Rep                                | 10.1038/s41598-020-78492-y            | Number of participants |
| 33316806 | Herth FJF et al.                | Respiration                            | 10.1159/000511376                     | Number of participants |
| 33318314 | Shi J et al.                    | Aging (Albany NY)                      | 10.18632/aging.202223                 | Number of participants |
| 33319213 | Weiss KD et al.                 | JTCVS Tech                             | 10.1016/j.xjtc.2020.11.016            | Number of participants |
| 33330582 | Yue X et al.                    | Front Nutr                             | 10.3389/fnut.2020.581679              | Number of participants |
| 33333393 | Widysanto A et al.              | Cytokine                               | 10.1016/j.cyto.2020.155393            | Number of participants |
| 33336766 | Bocci MG et al.                 | Eur Rev Med Pharmacol Sci              | 10.26355/eurrev_202012_24043          | Number of participants |
| 33350752 | Mallat J et al.                 | Medicine (Baltimore)                   | 10.1097/MD.00000000000023720          | Number of participants |
| 33353546 | Vu CA et al.                    | BMC Infect Dis                         | 10.1186/s12879-020-05701-4            | Number of participants |
| 33354635 | Aiswarya D et al.               | Kidney Int Rep                         | 10.1016/j.ekir.2020.12.003            | Number of participants |
| 33354678 | Li J et al.                     | Crit Care Explor                       | 10.1097/CCE.0000000000000307          | Number of participants |
| 33355217 | Luo P et al.                    | Clin Med (Lond)                        | 10.7861/clinmed.2020-0348             | Number of participants |
| 33380371 | Pascual Pareja JF et al.        | Med Clin (Barc)                        | 10.1016/j.medcli.2020.11.004          | No clinical outcomes   |
| 33388006 | Procter BC et al.               | Rev Cardiovasc Med                     | 10.31083/j.rcm.2020.04.260            | No analytical data     |
| 33393643 | Niwas R et al.                  | Adv Respir Med                         | 10.5603/ARM.a2020.0139                | Number of participants |
| 33402859 | Saggi SJ et al.                 | Clin Med Insights Circ Respir Pulm Med | 10.1177/1179548420980699              | Number of participants |
| 33425957 | Siempos II et al.               | Front Med (Lausanne)                   | 10.3389/fmed.2020.614152              | Number of participants |
| 33541491 | Gao X et al.                    | Zhonghua Wei Zhong Bing Ji Jiu Yi Xue  | 10.3760/cma.j.cn121430-20201019-00679 | Number of participants |
